# Supplementary material for: Investigating the eye movement characteristics of basketball players executing 3-point shot at varied intensities and their correlation with shot accuracy
Source: PeerJ. 2024 Jun 27;12:e17634. doi: 10.7717/peerj.17634 (PMC13035277; doi:10.7717/peerj.17634)
Supplement: Data S1 [file peerj-12-17634-s001.xlsx]

## Sheet: fixation duration
Intensity	front	top	bottom	top left	bottom left	top right	bottom right
low Intensity	680	200	400	360	120	370	200	0.55
low Intensity	380	290	580	200	0	300	200	0.49
low Intensity	560	500	400	230	300	200	0	0.53
low Intensity	600	490	500	300	0	300	190	0.52
low Intensity	720	330	600	290	0	290	200	0.56
low Intensity	720	400	450	200	160	300	0	0.55
low Intensity	600	400	500	290	260	241	0	0.52
low Intensity	500	450	450	500	0	352	0	0.49
low Intensity	500	360	400	230	200	359	0	0.5
low Intensity	620	369	430	0	300	300	150	0.55
low Intensity	700	400	400	390	0	300	220	0.56
low Intensity	750	400	460	320	200	320	0	0.57
low Intensity	650	300	380	300	270	390	200	0.5
low Intensity	630	500	450	280	140	320	130	0.49
low Intensity	720	400	460	280	130	268	0	0.58
low Intensity	600	500	481	300	0	0	230	0.48
low Intensity	700	490	400	300	0	320	0	0.53
low Intensity	550	380	500	370	0	340	190	0.49
low Intensity	600	500	530	210	0	385	180	0.52
low Intensity	440	210	518	200	180	490	200	0.45
moderate intensity	841	400	0	396	0	300	0	0.62
moderate intensity	792	480	200	400	0	400	0	0.6
moderate intensity	880	500	300	360	0	200	190	0.67
moderate intensity	810	380	200	0	200	300	0	0.64
moderate intensity	700	340	261	450	0	360	0	0.59
moderate intensity	720	490	0	420	0	450	0	0.59
moderate intensity	760	460	200	0	200	350	0	0.63
moderate intensity	786	300	200	350	0	390	0	0.66
moderate intensity	816	400	0	300	210	480	140	0.68
moderate intensity	916	500	200	400	260	400	0	0.69
moderate intensity	729	550	380	462	0	330	0	0.57
moderate intensity	780	350	0	0	0	410	130	0.59
moderate intensity	754	420	300	0	290	320	0	0.62
moderate intensity	768	520	200	465	0	390	200	0.61
moderate intensity	842	450	0	420	100	385	0	0.65
moderate intensity	824	400	320	0	180	320	0	0.64
moderate intensity	760	300	0	400	0	400	100	0.62
moderate intensity	700	460	230	425	210	390	0	0.64
moderate intensity	836	420	0	368	0	400	0	0.69
moderate intensity	720	390	282	400	150	200	0	0.65
high intensity	420	200	400	360	321	530	200	0.43
high intensity	380	419	580	300	0	420	200	0.37
high intensity	560	450	400	230	300	400	100	0.49
high intensity	600	490	500	300	360	300	190	0.5
high intensity	568	320	600	360	0	300	200	0.44
high intensity	590	400	450	200	160	400	100	0.41
high intensity	600	400	600	290	260	300	120	0.42
high intensity	500	360	450	500	0	480	0	0.42
high intensity	500	360	400	420	200	460	100	0.4
high intensity	620	260	516	0	300	300	262	0.45
high intensity	700	400	400	390	0	400	120	0.48
high intensity	750	400	460	450	200	320	0	0.5
high intensity	650	300	380	300	270	390	200	0.42
high intensity	630	500	450	280	140	420	130	0.41
high intensity	720	400	460	280	130	350	131	0.46
high intensity	600	500	560	468	0	0	230	0.42
high intensity	700	490	400	300	190	320	0	0.43
high intensity	550	590	500	370	0	420	190	0.42
high intensity	600	500	600	346	259	430	180	0.42
high intensity	440	360	600	381	180	490	200	0.37

## Sheet: number of fixations
Intensity	front	top	bottom	top left	bottom left	top right	bottom right
low intensity	2	2	1	2	1	2	1
low intensity	2	2	1	1	0	1	1
low intensity	3	2	2	2	2	2	0
low intensity	2	1	1	2	0	1	1
low intensity	2	2	1	1	0	2	1
low intensity	2	1	2	2	1	1	0
low intensity	2	2	1	1	1	1	0
low intensity	2	1	1	2	0	2	0
low intensity	2	1	2	2	1	2	0
low intensity	1	2	1	0	1	1	0
low intensity	2	3	1	2	0	2	1
low intensity	1	2	2	2	1	1	1
low intensity	1	2	1	2	1	1	0
low intensity	2	2	1	1	1	2	1
low intensity	1	3	2	2	1	1	0
low intensity	2	2	1	2	0	0	1
low intensity	2	2	1	2	0	1	0
low intensity	2	2	2	1	0	2	1
low intensity	3	2	1	1	0	1	1
low intensity	2	3	2	1	1	2	1
moderate intensity	2	2	0	1	0	1	0
moderate intensity	2	2	1	1	0	2	0
moderate intensity	1	2	2	1	0	1	1
moderate intensity	2	1	2	0	2	2	0
moderate intensity	1	2	1	3	0	1	0
moderate intensity	2	1	0	2	0	2	0
moderate intensity	2	2	1	0	1	1	0
moderate intensity	2	1	1	2	0	1	0
moderate intensity	2	1	0	2	1	1	1
moderate intensity	2	2	1	2	1	2	0
moderate intensity	2	1	1	2	0	1	0
moderate intensity	1	2	0	0	0	2	1
moderate intensity	1	2	1	0	1	1	0
moderate intensity	2	2	1	2	0	1	1
moderate intensity	1	2	0	2	1	1	0
moderate intensity	2	1	1	0	1	1	0
moderate intensity	1	2	0	2	0	1	1
moderate intensity	1	3	1	2	1	1	0
moderate intensity	2	2	0	1	0	2	0
moderate intensity	1	2	1	2	1	1	0
high intensity	2	2	1	2	2	2	1
high intensity	2	3	2	1	1	2	1
high intensity	3	2	1	2	0	2	1
high intensity	3	1	2	2	2	1	1
high intensity	3	2	2	1	2	2	1
high intensity	2	1	1	2	0	2	1
high intensity	3	2	2	2	1	2	1
high intensity	2	1	3	1	1	3	0
high intensity	3	1	2	2	0	2	1
high intensity	1	2	2	2	1	3	0
high intensity	2	3	1	1	2	1	1
high intensity	1	2	2	2	0	2	1
high intensity	3	2	2	1	1	1	0
high intensity	3	2	2	1	1	1	1
high intensity	1	3	1	2	2	2	1
high intensity	2	2	3	2	0	0	1
high intensity	2	2	2	1	2	2	0
high intensity	2	2	1	4	0	2	1
high intensity	3	2	2	2	1	2	2
high intensity	2	3	3	2	1	2	2

## Sheet: 3-point field goal percentage
Intensity	3-point field goal percentage
low intensity	0.55
low intensity	0.49
low intensity	0.53
low intensity	0.52
low intensity	0.56
low intensity	0.55
low intensity	0.52
low intensity	0.49
low intensity	0.5
low intensity	0.55
low intensity	0.56
low intensity	0.57
low intensity	0.5
low intensity	0.49
low intensity	0.58
low intensity	0.48
low intensity	0.53
low intensity	0.49
low intensity	0.52
low intensity	0.45
moderate intensity	0.62
moderate intensity	0.6
moderate intensity	0.67
moderate intensity	0.64
moderate intensity	0.59
moderate intensity	0.59
moderate intensity	0.63
moderate intensity	0.66
moderate intensity	0.68
moderate intensity	0.69
moderate intensity	0.57
moderate intensity	0.59
moderate intensity	0.62
moderate intensity	0.61
moderate intensity	0.65
moderate intensity	0.64
moderate intensity	0.62
moderate intensity	0.64
moderate intensity	0.69
moderate intensity	0.65
high intensity	0.43
high intensity	0.37
high intensity	0.49
high intensity	0.5
high intensity	0.44
high intensity	0.41
high intensity	0.42
high intensity	0.42
high intensity	0.4
high intensity	0.45
high intensity	0.48
high intensity	0.5
high intensity	0.42
high intensity	0.41
high intensity	0.46
high intensity	0.42
high intensity	0.43
high intensity	0.42
high intensity	0.42
high intensity	0.37
